# Supplementary material for: Psychometric evaluation of the Self-Regulation in Internet Use Scale (SRIU) for adolescents
Source: Research Square preprint supplement (doi:10.21203/rs.3.rs-7420843/v1), 2025-09-23
Supplement: Supplementary file 1 [file a005af0485a8860ba2be388b.docx]

Self-regulation internet use questioner (SRIUQ)

| Item | number |
| --- | --- |
| When I use the Internet, I know my purpose for using it exactly, for example, games and entertainment, educational activities, chatting with friends, etc. | 1 |
| I consider certain hours to use the internet | 2 |
| When I have a specific goal of using the Internet, I can plan to achieve it | 3 |
| I plan for the hours of internet usage | 4 |
| "I never go online to pass the time" | 5 |
| If my friends insist on playing online group games, I have the ability to reject their offer. | 6 |
| I can resist my favorite internet game when I have important work to do. | 7 |
| I only check my messages during the hours I specify. | 8 |
| I can maintain focus on a single activity for extended periods away from the internet. | 9 |
| Spending leisure time on social networks is safer for teenagers than outdoor environments. | 10 |
| Excessive use of the Internet can reduce my concentration on my academic activities. | 11 |
| Participating in online games strengthens my relationships with my friends. | 12 |
| Limiting internet use creates opportunities for new hobbies, including spending time with family and friends and participating in sports. | 13 |
| Effective time management online helps me connect more meaningfully with others. | 14 |
| Setting limits on internet use helps me be more successful in other areas of my life, such as studies, sports, etc. | 15 |
| My efforts to limit my Internet use to non-essential activities such as gaming and entertainment are worthwhile. | 16 |
| My effective and timely internet use supports my goal achievement. | 17 |
| Maintaining my physical and mental health by reducing my dependence on the internet is valuable to me. | 18 |
| Using the Internet is valuable to me because it provides entertainment and enjoyment. | 19 |
| Not being dependent on virtual channels is valuable to me. | 20 |
| I need to use social media more to keep in touch with my friends. | 21 |
| I resist checking social media until I finish my work. | 22 |
| I remind myself that my studies and other activities are much more important than the virtual world and searching the Internet. | 23 |
| If I'm not online, I'm constantly fighting with my sibling. | 24 |
| I have to play group games for long hours to have a good relationship with my friends. | 25 |
| When my family is on the phone, I join in to avoid boredom. | 26 |
| I am aware of the impact that time spent online has on my health. | 27 |
| I notice when I get stressed while spending time on the internet and cyberspace. | 28 |
| I recognize the situations that lead me to overuse the Internet. | 29 |
| I monitor my mental state before and after using the Internet to understand its impact on my health. | 30 |
| I consider others' opinions on Internet use to modify my habits. | 31 |
| I blame myself for spending too much time on social media. | 32 |
| I feel guilty or ashamed after spending too much time on the Internet. | 33 |
| I hate myself for not being able to control my internet usage. | 34 |
| I feel anxious and worried when I realize I have wasted too much time on the Internet. | 35 |
| I feel better when I turn to the internet instead of facing my problems. | 36 |
| I reassess and reorganize my unproductive Internet usage. | 37 |
| Since connecting with my friends online brings me joy and entertainment, I continue to use the Internet. | 38 |
| I spend a lot of time online, but I'm satisfied and have no intention of changing that. | 39 |
| I prioritize my emotional and mental health and will disconnect from the internet if needed | 40 |

|  |
| --- |
